# Supplementary material for: Correspondence of Neutralizing Humoral Immunity and CD4 T Cell Responses in Long Recovered Sudan Virus Survivors
Source: Viruses. 2016 May 11;8(5):133. doi: 10.3390/v8050133 (PMC4885088; doi:10.3390/v8050133)
Supplement: Supplementary File 1 [file viruses-08-00133-s001.pdf]

# Supplemental Material: Correspondence of Neutralizing Humoral Immunity and CD4 T Cell Responses in Long Recovered Sudan Virus Survivors

Ariel Sobarzo, Spencer W. Stonier, Andrew S. Herbert, David E. Ochayon, Ana I. Kuehne, Yael Eskira, Shlomit Fedida-Metula, Neta Tali, Eli C. Lewis, Moses Egesa, Stephen Cose, Julius Julian Lutwama, Victoria Yavelsky, John M. Dye and Leslie Lobel

## Controls

## SUDV survivors

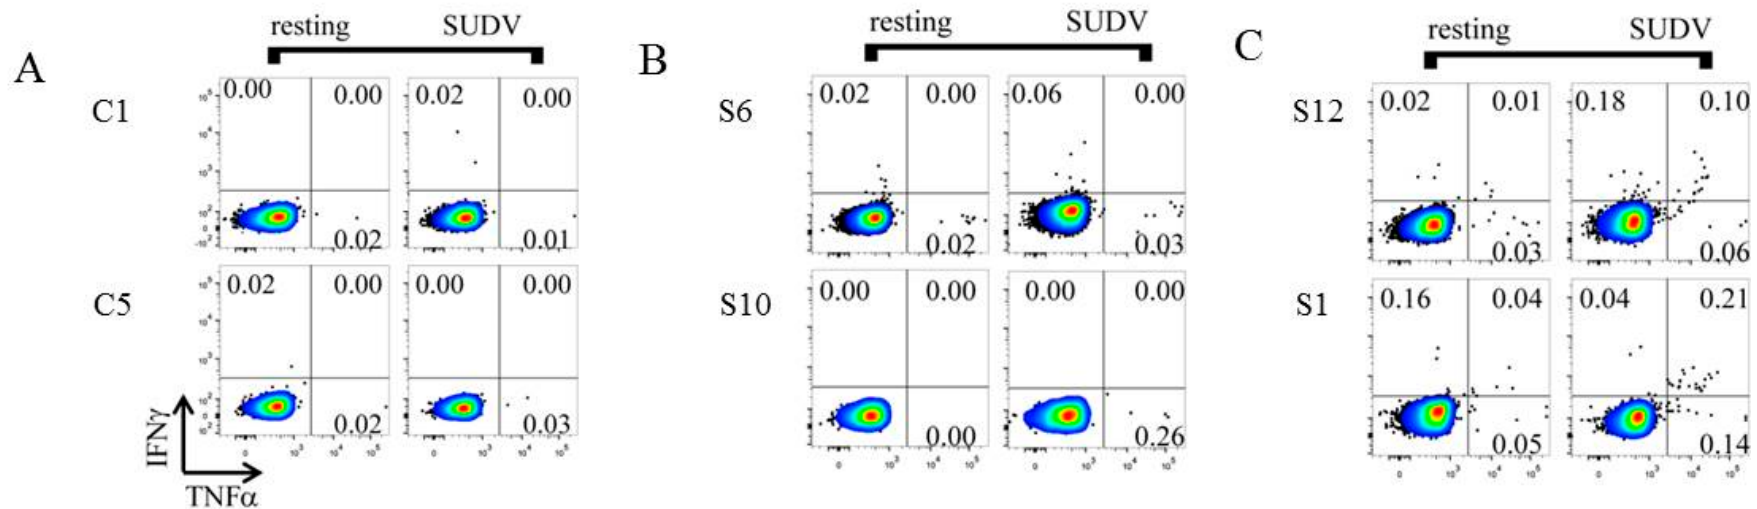

**Figure S1.** Flow cytometry CD8 T cell analysis of whole blood from survivors and non-infected controls following SUDV whole antigen stimulation. Represented plots depict IFN $\gamma$  and TNF $\alpha$  cytokine responses in CD8 T cells following 22 h of stimulation with inactivated SUDV antigen of controls; C1 and C5 (A); and SUDV survivors with no detected CD8 T cell response; S6 and S10 (B) and detected S1 and S12 CD8 T cell response (C).

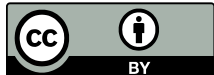

© 2016 by the authors; licensee MDPI, Basel, Switzerland. This article is an open access article distributed under the terms and conditions of the Creative Commons by Attribution (CC-BY) license (<http://creativecommons.org/licenses/by/4.0/>).
